# Supplementary material
Source: PubMed Central journal article supplement (PMC3148948)
Supplement: NIHMS309132-supplement-1_si_001.pdf [file NIHMS309132-supplement-1_si_001.pdf]

# Supporting information

## Polymer-Based Photocoupling Agent for the Efficient Immobilization of Nanomaterials and Small Molecules

*Takuya Kubo,<sup>†,‡</sup> Xin Wang,<sup>†</sup> Qi Tong,<sup>†</sup> Mingdi Yan<sup>†,\*</sup>*

<sup>†</sup>Department of Chemistry, Portland State University, 1719 SW 10th Ave. Portland, OR 97201

<sup>‡</sup>Graduate School of Environmental Studies, Tohoku University, Aoba 6-6-20, Aramaki, Aobaku, Sendai 9808579, Japan

### **Table of contents**

**Figure S1.** AFM images of PAAm-PFPA modified surfaces

**Figure S2.** FTIR spectra of PFPA-NHS and PAAm-PFPA

**Figure S3.** FTIR spectra of PAAm-PFPAs

**Figure S4.** DLS result of polystyrene nanoparticles

**Figure S5.** TEM and DLS results of silica nanoparticles

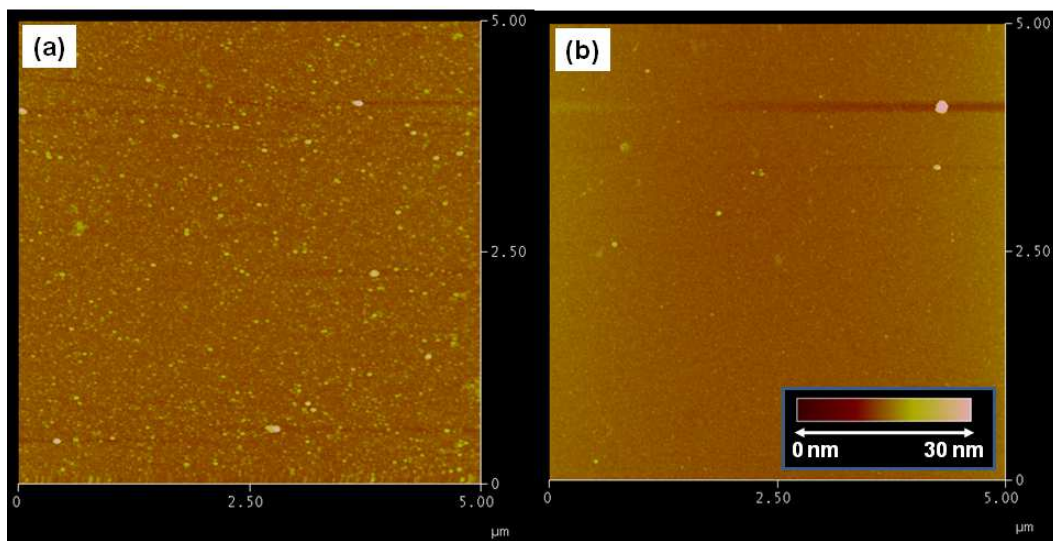

**Figure S1.** AFM images of PAAm-PFPA-modified surfaces. The samples were prepared by treating the epoxy-functionalized wafers with (a) PAAm-PFPA (PAAm 15,000, 1:4 mole ratio of PFPA-NHS/AAm) containing potassium carbonate in ethanol/water, and (b) PAAm-PFPA (PAAm 70,000, 1:1 mole ratio of PFPA-NHS/AAm) in water/pyridine.

— PFPA-NHS  
— PAAm-PFPA

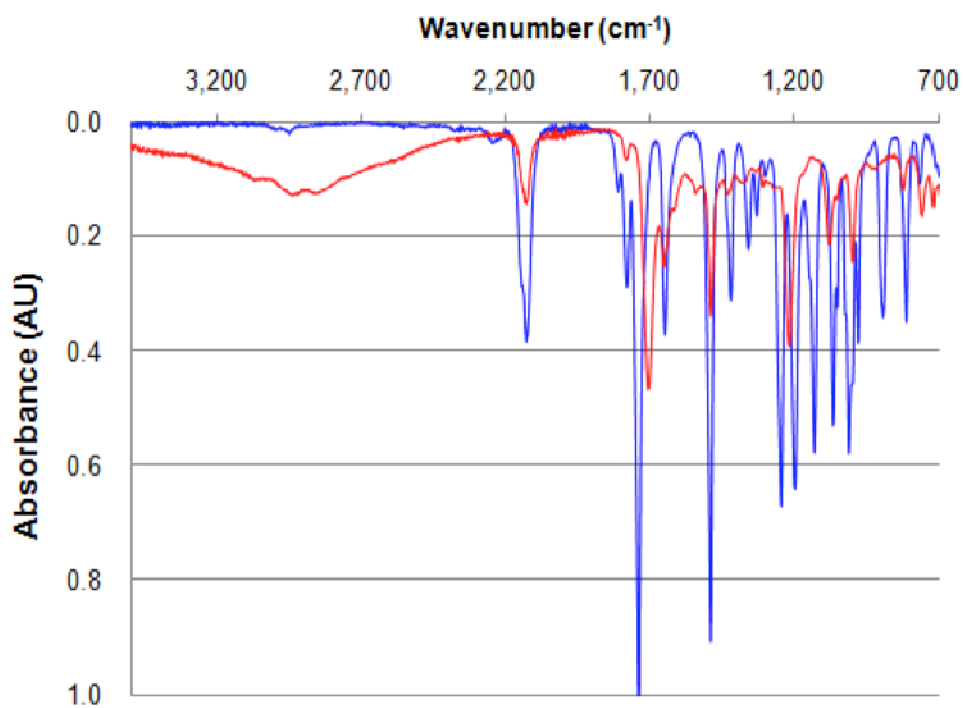

**Figure S2.** FTIR spectra of PFPA-NHS (blue) and PAAm-PFPA (red) synthesized from 1:1 mole ratio of PFPA-NHS/AAm.

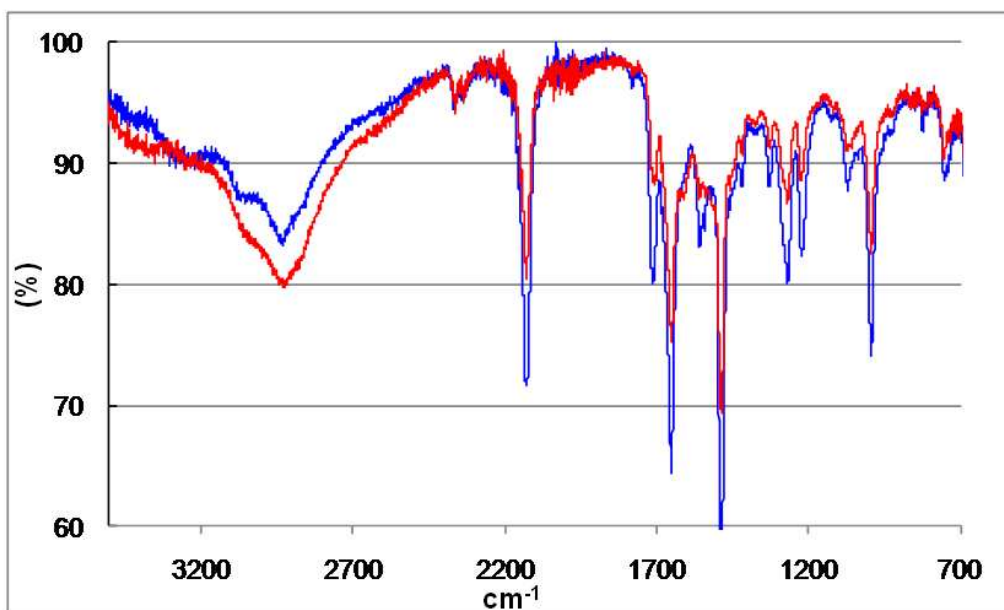

**Figure S3.** FTIR spectra of PAAm-PFPA synthesized from 1:4 (red) and 1:1 (blue) mole ratio of PFPA-NHS/AAm.

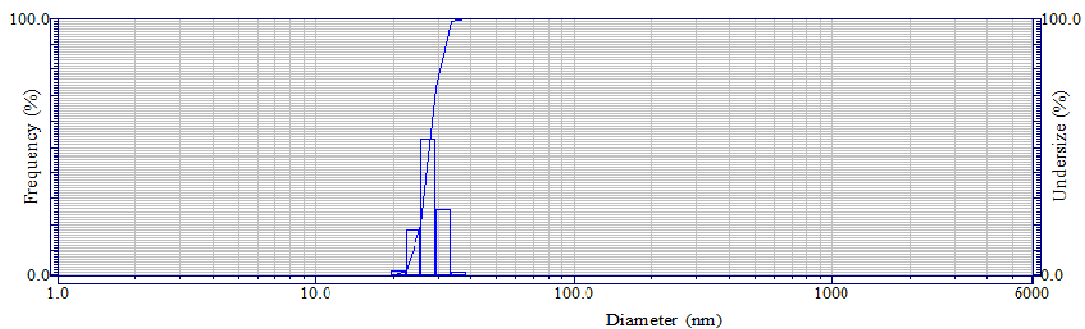

**Figure S4.** DLS of polystyrene nanoparticles, average diameter: 28 nm.

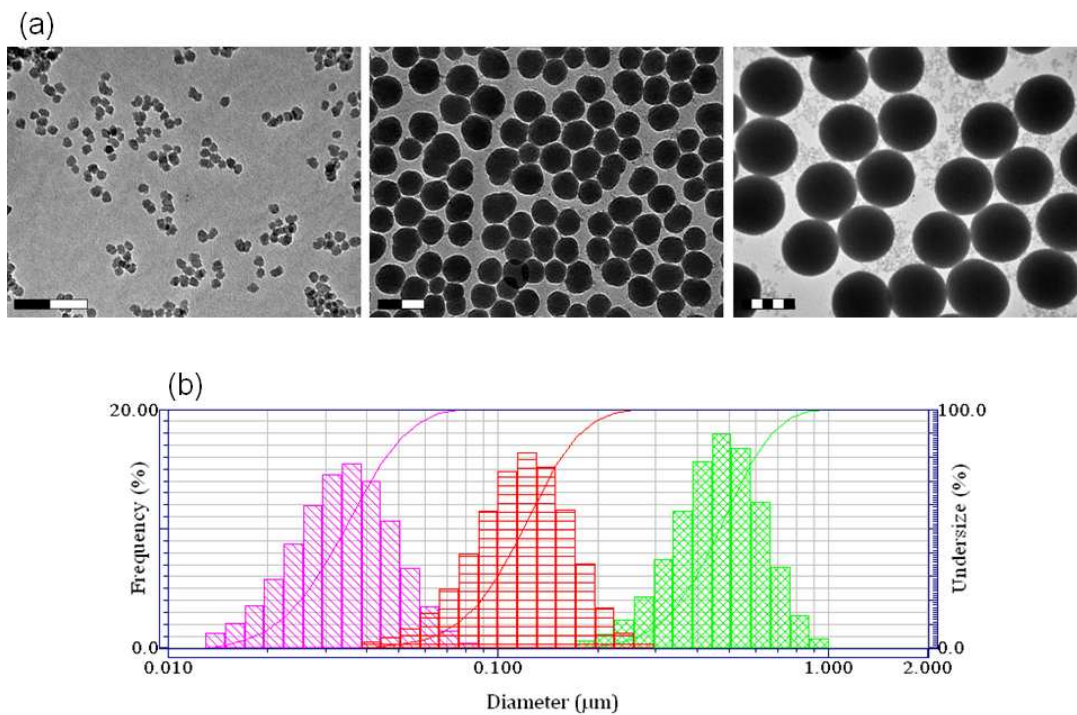

**Figure S5.** (a) TEM and (b) DLS of silica nanoparticles of diameters 35 nm, 120 nm, and 470 nm, respectively. The scale bars in the TEM images are 100 nm.
